# Supplementary material for: Do some patients receive unnecessary parenteral nutrition after pancreatoduodenectomy? Results from an international multicentre study
Source: PubMed Central journal article supplement — Ann Hepatobiliary Pancreat Surg. 2023 Dec 14;28(1):70–9. doi: 10.14701/ahbps.23-071 (PMC10896679; doi:10.14701/ahbps.23-071), 2023-12-14
Supplement: ahbps-28-1-70-supple.pdf [file ahbps-28-1-70-supple.pdf]

**Supplementary Table 1.** Classification of POPF

| Criterion                                                           | Biochemical leak<br>(formerly grade A POPF) | Grade B POPF                | Grade C POPF             |
|---------------------------------------------------------------------|---------------------------------------------|-----------------------------|--------------------------|
| Drain amylase three times the upper limit of the normal serum value | Yes                                         | Yes                         | Yes                      |
| Persisting pancreatic drainage for more than three weeks            | No                                          | Yes                         | Yes                      |
| Clinically relevant <sup>a)</sup> change to patient management      | No                                          | Yes                         | Yes                      |
| Percutaneous or endoscopic treatment for a POPF-related collection  | No                                          | Yes                         | Yes                      |
| Angiographic procedure for POPF-related bleeding                    | No                                          | Yes                         | Yes                      |
| Reoperation for POPF                                                | No                                          | No                          | Yes                      |
| Signs of infection related to POPF                                  | No                                          | Yes (without organ failure) | Yes (with organ failure) |
| POPF-related organ failure <sup>b)</sup>                            | No                                          | Yes                         | Yes                      |
| POPF-related death                                                  | No                                          | No                          | Yes                      |

In the text grade B and grade C POPF have collectively been referred to as clinically relevant POPF.

POPF, postoperative pancreatic fistula.

<sup>a)</sup>Suggests prolongation of hospital/critical care stay, includes the use of therapeutic agents specifically employed for fistula management or its consequences (includes somatostatin analogues, parenteral nutrition, blood products and other medications). <sup>b)</sup>Postoperative organ failure is defined as the need for reintubation, haemodialysis and/or inotropic agents for more than 24 hours for respiratory, renal or cardiac insufficiency, respectively. Definitions according to the revised 2016 International Study Group of Pancreatic Surgery (ISGPS).

**Supplementary Table 2.** Classification of postoperative bile leak

| Criterion                                                      | Grade A bile leak | Grade B bile leak                   | Grade C bile leak                                                |
|----------------------------------------------------------------|-------------------|-------------------------------------|------------------------------------------------------------------|
| Clinical condition                                             | Mildly impaired   | Moderately impaired                 | Severely impaired                                                |
| Symptoms/signs                                                 | Commonly none     | Abdominal pain ± signs of infection | Life-threatening condition ± organ failure ± biliary peritonitis |
| Persistent biliary leakage for more than one week              | No <sup>a)</sup>  | Commonly yes                        | Yes                                                              |
| Need for diagnostic assessment                                 | No                | Commonly yes                        | Yes                                                              |
| Positive radiological findings (e.g., biloma, abscess or leak) | Possibly yes      | Commonly yes                        | Commonly yes                                                     |
| Relaparotomy required                                          | No                | No                                  | Yes                                                              |
| Prolonged hospital stay                                        | Commonly no       | Commonly yes                        | Yes                                                              |

<sup>a)</sup>Patients with a grade A bile leak persisting for more than one week are diagnosed with grade B leakage regardless of the need for therapeutic intervention. Definitions according to the 2011 International Study Group of Liver Surgery (ISGLS).

**Supplementary Table 3.** Classification of PPH

| Criterion                                                          | Grade A PPH                               | Grade B PPH                                                                                                                                              | Grade C PPH                                                                                              |
|--------------------------------------------------------------------|-------------------------------------------|----------------------------------------------------------------------------------------------------------------------------------------------------------|----------------------------------------------------------------------------------------------------------|
| Time of onset, location, severity, and clinical impact of bleeding | Early, intra- or extraluminal, mild       | Early, intra- or extraluminal, severe<br>Late, intra- or extraluminal, mild                                                                              | Late, intra- or extraluminal, severe                                                                     |
| Clinical condition                                                 | Well                                      | Often well/intermediate,<br>very rarely life-threatening                                                                                                 | Severely impaired, life-threatening                                                                      |
| Diagnostic consequence                                             | Observation, blood count,<br>USS $\pm$ CT | Observation, blood count, USS,<br>CT angiogram, endoscopy if<br>bleeding is intra-luminal                                                                | CT angiogram, endoscopy if<br>bleeding is intraluminal                                                   |
| Therapeutic consequence                                            | None                                      | Transfusion of fluid/blood,<br>high level or critical care bed,<br>therapeutic endoscopy if intraluminal,<br>embolisation,<br>relaparotomy for early PPH | CT angiography and embolisation,<br>endoscopy if intraluminal or<br>relaparotomy and intensive care stay |

Timing: early: within 24 hours of the index operation, late: more than 24 hours after the index operation. Severity: mild: small/medium volume blood loss, decrease in haemoglobin concentration < 30 g/L, maximum treatment required is volume resuscitation or blood transfusions, no need for reoperation or angiographic treatment, severe: large volume blood loss, haemoglobin decrease > 30 g/L, clinically significant signs of blood loss, need for three or more units of blood, need for angiographic treatment or relaparotomy. Definitions according to the 2007 International Study Group of Pancreatic Surgery (ISGPS). PPH, post-pancreatectomy haemorrhage; USS, ultrasound scan; CT, computed tomography.

**Supplementary Table 4.** Classification of DGE

| Criterion                                           | Grade A DGE                                 | Grade B DGE                                  | Grade C DGE                                   |
|-----------------------------------------------------|---------------------------------------------|----------------------------------------------|-----------------------------------------------|
| NG tube required                                    | 4–7 days or<br>reinsertion > 3 days post-op | 8–14 days or<br>reinsertion > 7 days post-op | > 14 days or<br>reinsertion > 14 days post-op |
| Unable to tolerate solid oral intake by post-op day | 7                                           | 14                                           | 21                                            |
| Vomiting/gastric distension                         | Possibly                                    | Yes                                          | Yes                                           |
| Use of prokinetics                                  | Possibly                                    | Yes                                          | Yes                                           |

Definitions according to the 2007 International Study Group of Pancreatic Surgery (ISGPS).

DGE, delayed gastric emptying; NG, nasogastric.

**Supplementary Table 5.** Clavien-Dindo classification of surgical complications

| Grade | Definition                                                                                                                                                                                                                                                                     |
|-------|--------------------------------------------------------------------------------------------------------------------------------------------------------------------------------------------------------------------------------------------------------------------------------|
| 1     | Any deviation from the normal postoperative course without the need for pharmacological treatment or surgical, endoscopic, or radiological interventions. Allowed therapeutic regimens are: antiemetics, antipyretics, analgesics, diuretics, electrolytes, and physiotherapy. |
| 2     | Requiring pharmacological treatment with drugs other than such allowed for grade 1 complications. Blood transfusions and parenteral nutrition are also included.                                                                                                               |
| 3a    | Requiring surgical, endoscopic, or radiological intervention under local or regional anaesthesia                                                                                                                                                                               |
| 3b    | Requiring surgical, endoscopic, or radiological intervention under general anaesthesia                                                                                                                                                                                         |
| 4a    | Life-threatening complication requiring critical care management (single organ failure)                                                                                                                                                                                        |
| 4b    | Life-threatening complication requiring critical care management (multiorgan failure)                                                                                                                                                                                          |
| 5     | Death of patient                                                                                                                                                                                                                                                               |
